# Supplementary material for: Effects of solvent on pyrolysis-assisted catalytic hydrogenolysis of softwood lignin for high-yield production of monomers and phenols, as studied using coniferyl alcohol as a major primary pyrolysis product
Source: Royal Society of Chemistry journal article supplement (doi:10.1039/d3su00128h), 2023-01-01
Supplement: d3su00128h1.pdf [file d3su00128h1.pdf]

**Table S1.** Yields of monomers obtained from pyrolysis-assisted catalytic hydrogenolysis of Japanese cedar MWL in different solvents (temperature: 350 °C; treatment time: 30 min; Pd/C: 10 mg; H<sub>2</sub>: 3 mL/0.1 MPa)

| Solvent                    | H2O  | MeOH | Dioxane | Acetone | Anisole | Benzene | Toluene | Hexane |
|----------------------------|------|------|---------|---------|---------|---------|---------|--------|
| Phenol                     | -    | -    | -       | -       | n*      | n*      | 4.9     | n*     |
| Methylphenol               | 2.3  | 2.5  | -       | -       | 6.0     | 3.9     | 1.9     | 3.8    |
| Ethylphenol                | 1.7  | 1.6  | 0.0     | 1.8     | 4.6     | 3.5     | 3.6     | 4.4    |
| Propylphenol               | 0.7  | 0.7  | -       | -       | 0.8     | 1.9     | 1.3     | 1.1    |
| Guaiacol                   | 7.5  | 8.2  | 12.8    | 8.0     | 14.2    | 4.0     | 5.8     | 7.9    |
| Methyl guaiacol            | 5.1  | 5.4  | 7.2     | 5.1     | 6.3     | 5.1     | 3.5     | 4.8    |
| Ethyl guaiacol             | 17.5 | 11.5 | 16.4    | 29.8    | 20.3    | 21.9    | 18.9    | 15.6   |
| Propyl guaiacol            | 8.5  | 4.1  | 4.8     | 6.6     | 4.1     | 6.0     | 3.3     | 3.9    |
| Ethyl catechol             | 3.8  | 0.0  | -       | 3.4     | 0.6     | -       | -       | -      |
| Acetovanillone             | -    | 0.1  | 0.8     | 0.6     | -       | -       | -       | -      |
| Propiovanillone            | 0.1  | 0.6  | 1.0     | 0.7     | -       | -       | -       | -      |
| Guaiacylacetone            | 0.1  | -    | -       | -       | -       | -       | -       | -      |
| Dihydro coniferyl alcohol  | 2.2  | 10.5 | 11.0    | -       | -       | -       | -       | -      |
| Dihydro-p-coumaryl alcohol | 0.0  | 0.6  | -       | 0.0     | -       | -       | -       | -      |
| H-/Alkyl- guaiacols        | 38.6 | 29.2 | 41.2    | 49.5    | 45.0    | 37.0    | 31.4    | 32.1   |
| Phenols                    | 4.6  | 4.8  | 0.0     | 1.8     | 11.4    | 9.3     | 6.7     | 9.3    |
| Catechols                  | 3.8  | 0.0  | 0.0     | 3.4     | 0.6     | 0.0     | 0.0     | 0.0    |
| DHCA                       | 2.2  | 10.5 | 11.0    | -       | -       | -       | -       | -      |
| Sum                        | 49.6 | 45.8 | 54.0    | 56.0    | 56.9    | 46.3    | 43.1    | 41.4   |

- : not detected

n\* : Overlapped with other signals

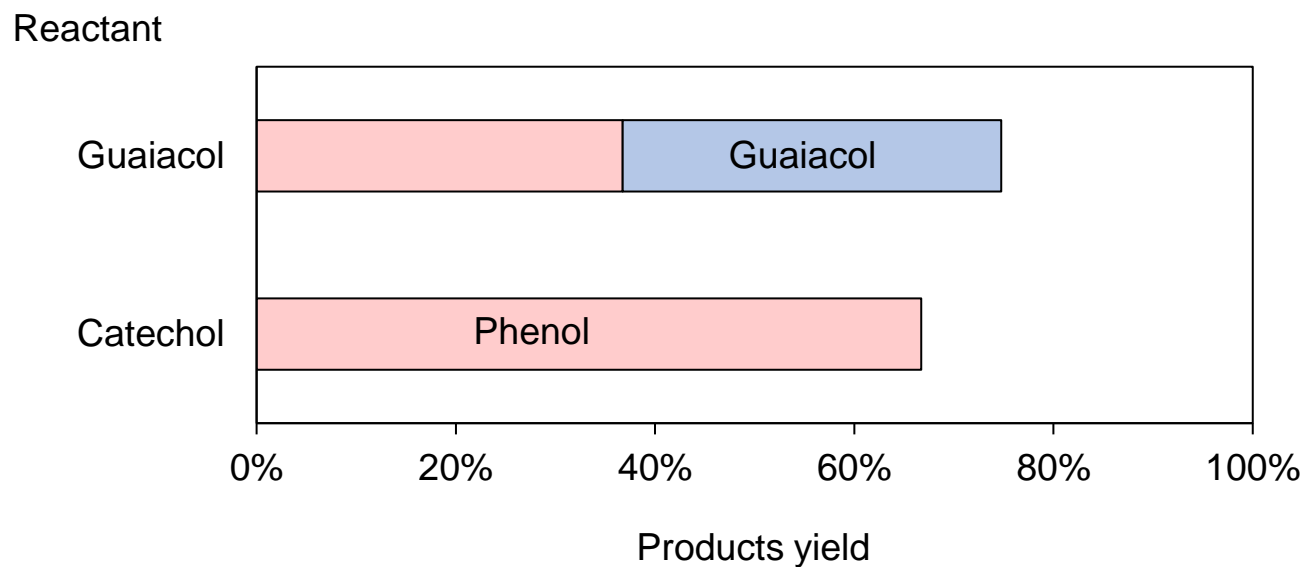

**Figure S1.** Monomers obtained from pyrolysis-assisted catalytic hydrogenolysis of guaiacol and catechol in water at 350 °C for 60 min (reaction compound: 10 mg; Pd/C: 10 mg; water: 2 mL; H<sub>2</sub>: 3 mL/0.1 MPa).

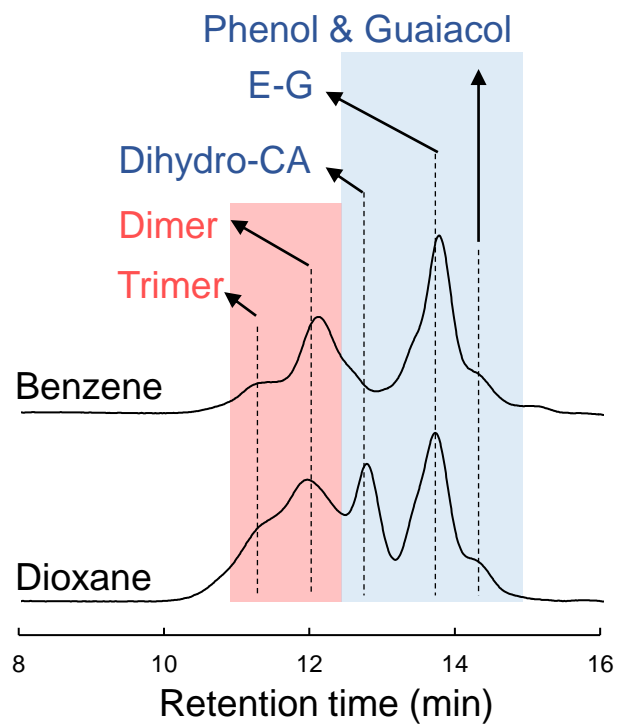

**Figure S2.** Gel-permeation chromatograms of products obtained from pyrolysis-assisted catalytic hydrogenolysis of MWL after treatment at 350 °C for 30 min in benzene and dioxane.

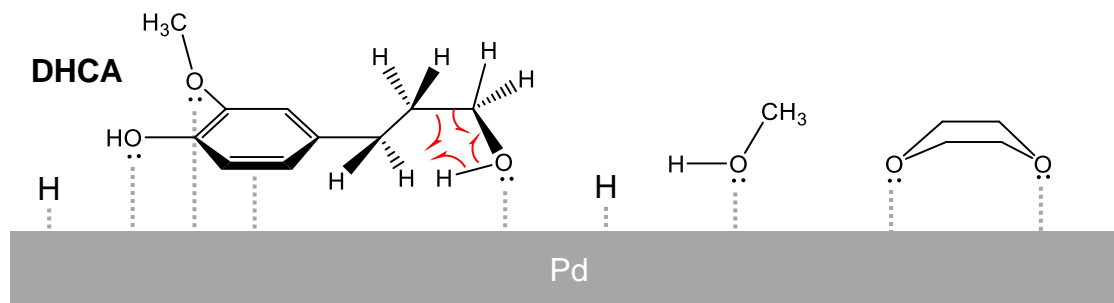

**Figure S3.** Possible association modes of DHCA, methanol, and dioxane on Pd surface during pyrolysis-assisted hydrogenolysis.

a. In H<sub>2</sub>O

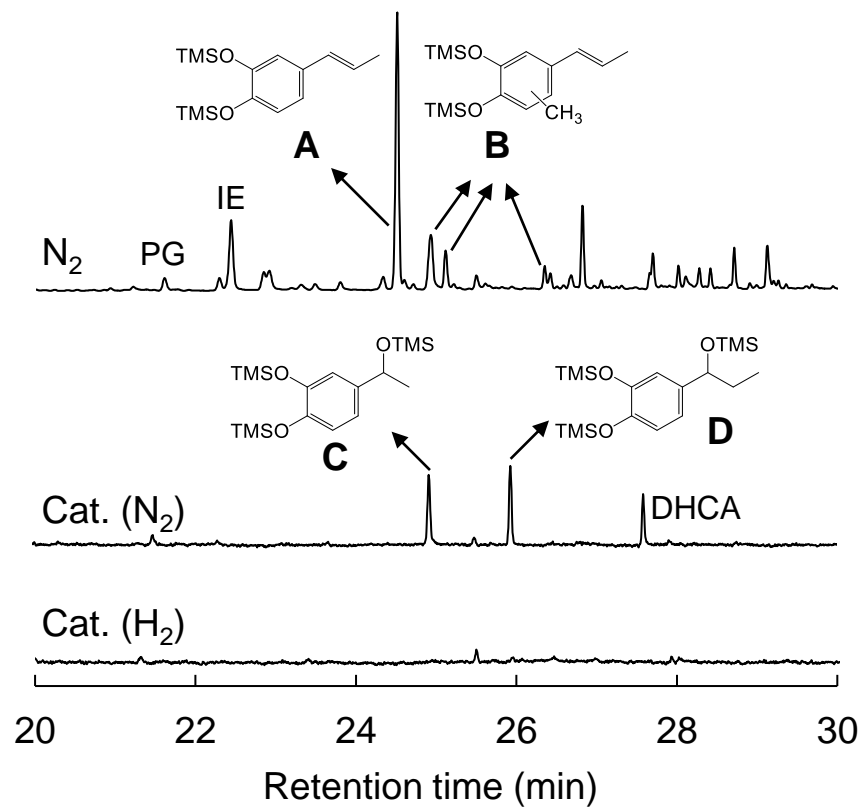

b. In MeOH

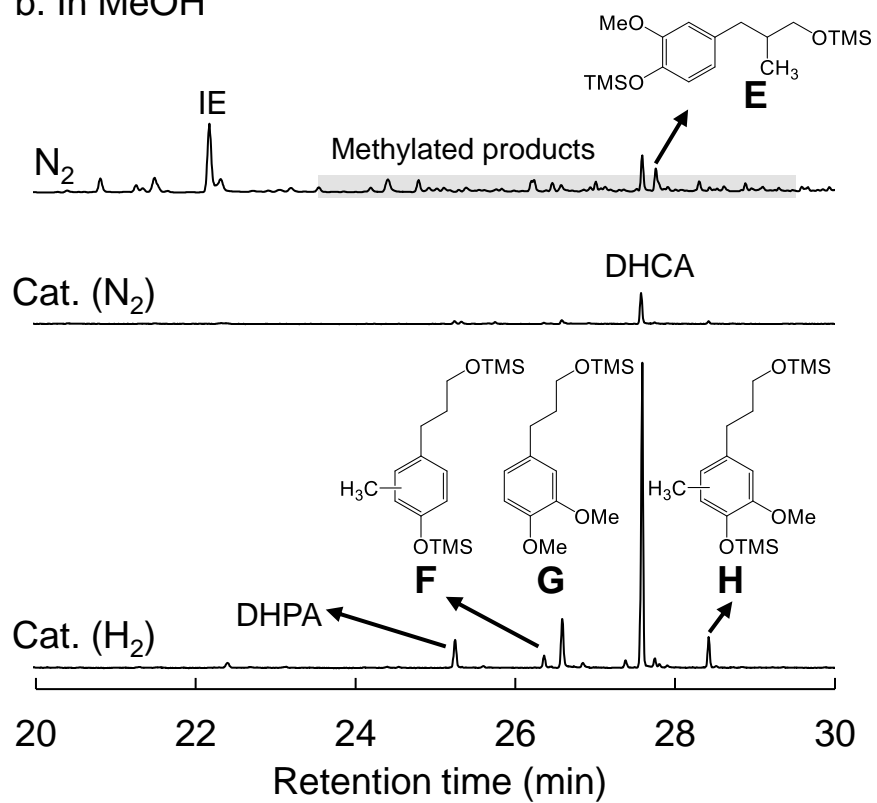

c. In anisole

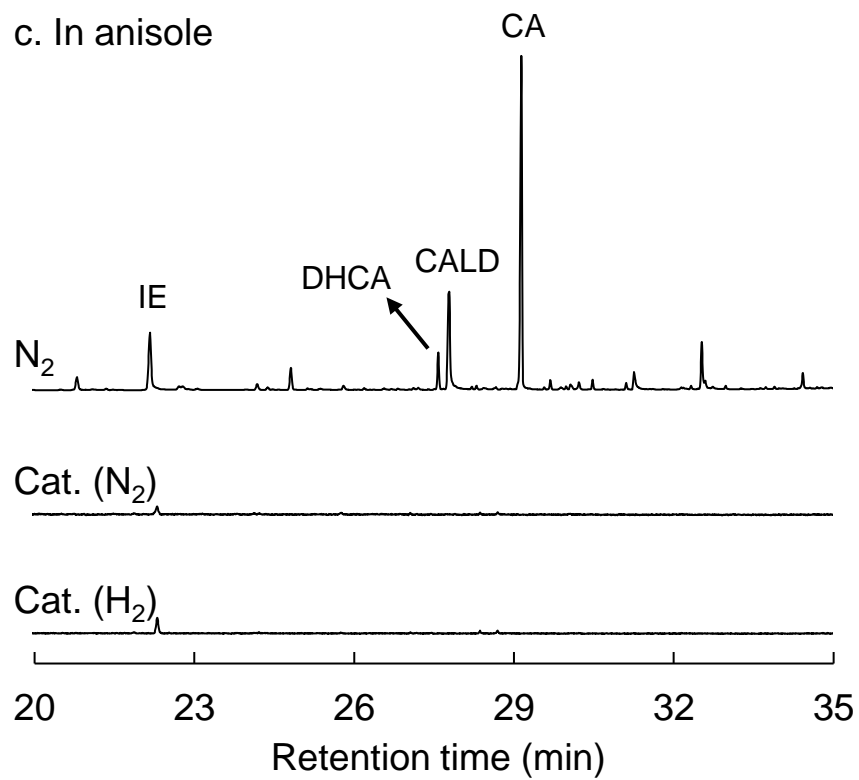

Cat. ( $N_2$ )

Cat. ( $H_2$ )

20 23 26 29 32 35

Retention time (min)

d. In toluene

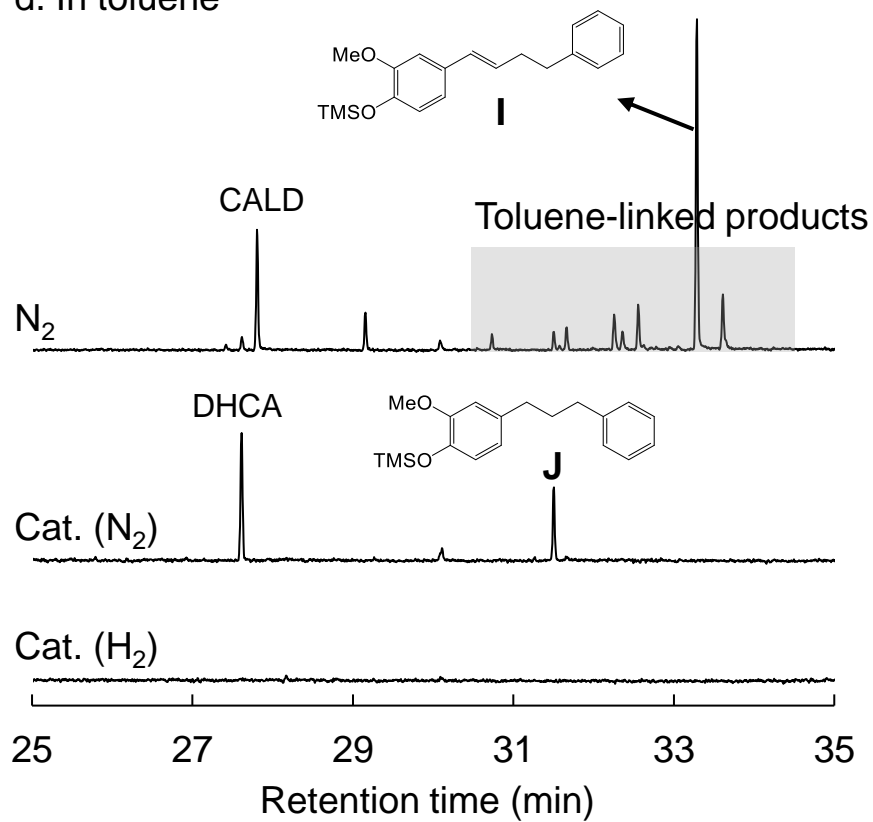



e. In hexane

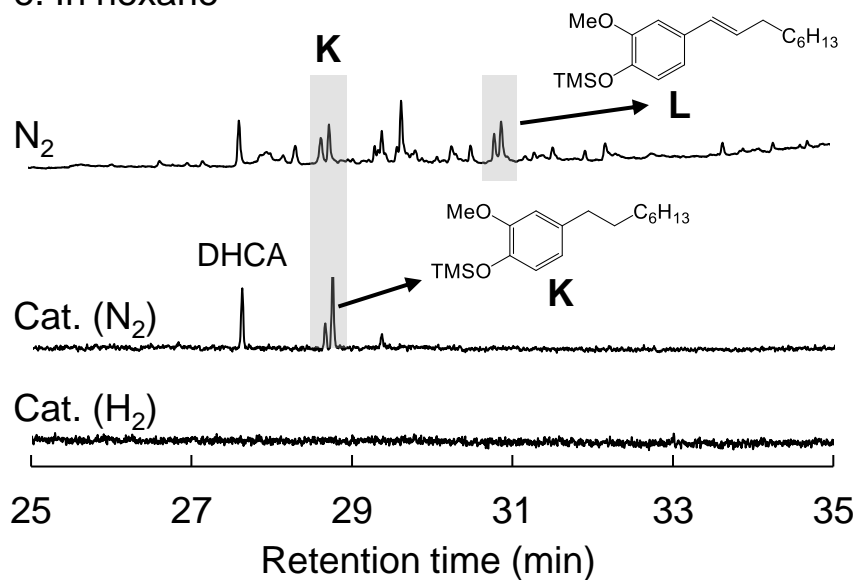

**Figure S4.** Gas chromatography-mass spectrometry total-ion chromatograms of trimethylsilyl derivatives of reaction mixtures obtained from coniferyl alcohol by thermal treatment in (a) water, (b) methanol, (c) anisole, (d) toluene, and (e) hexane at 350 °C for 60 min.

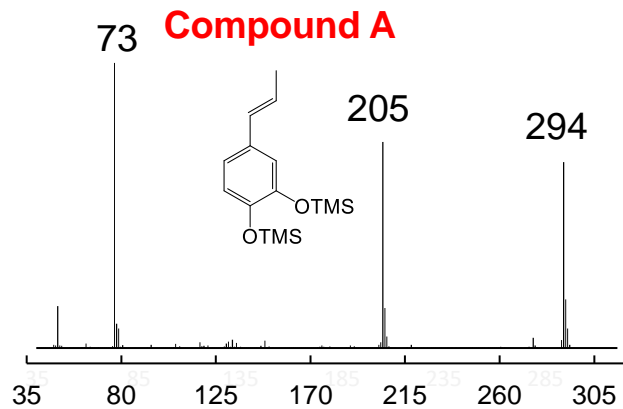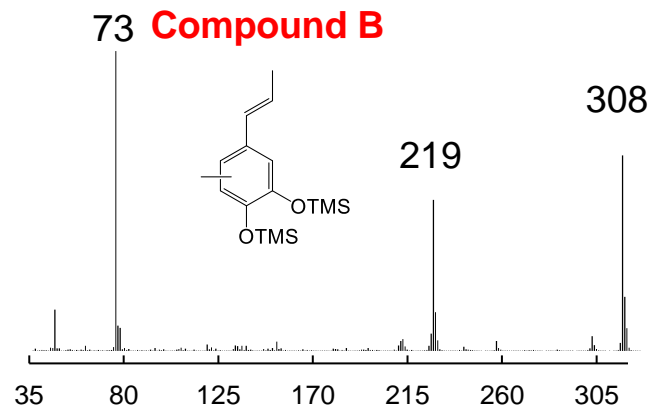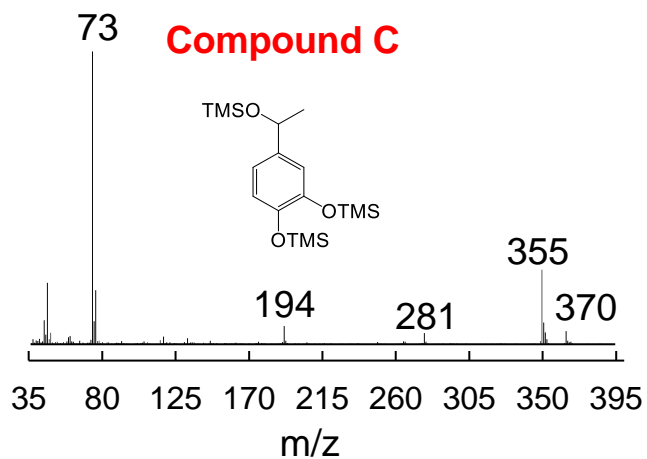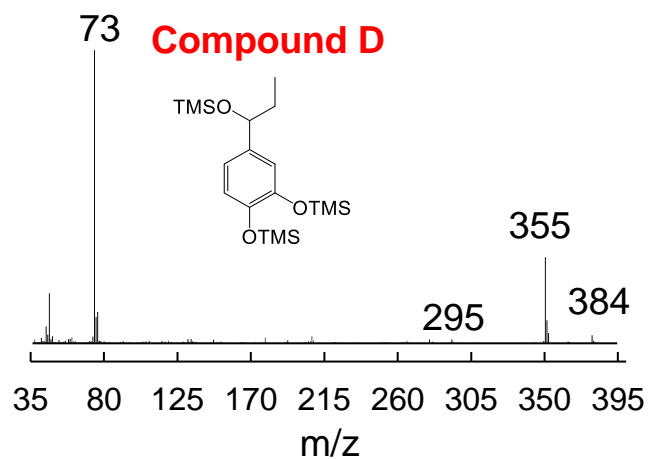

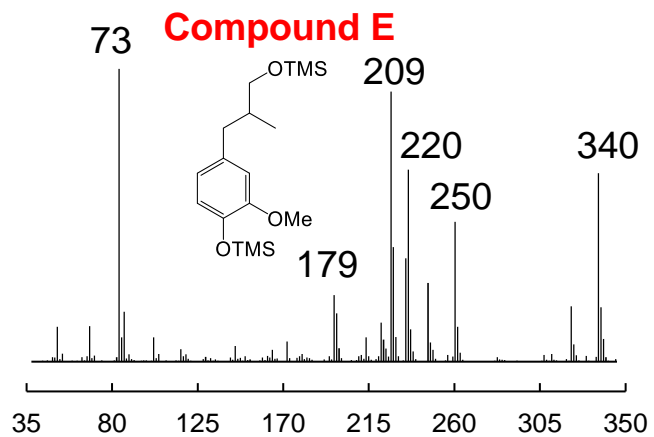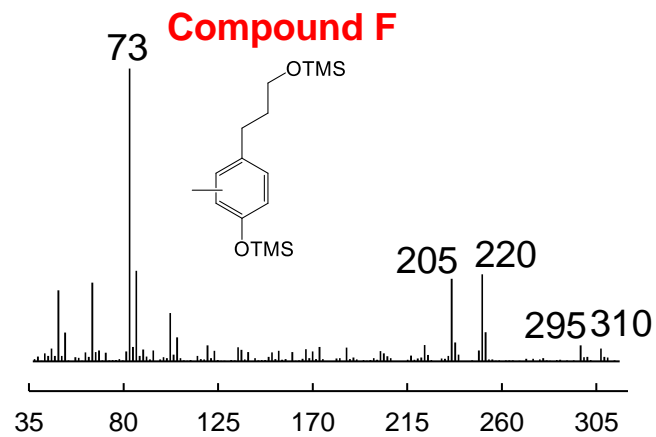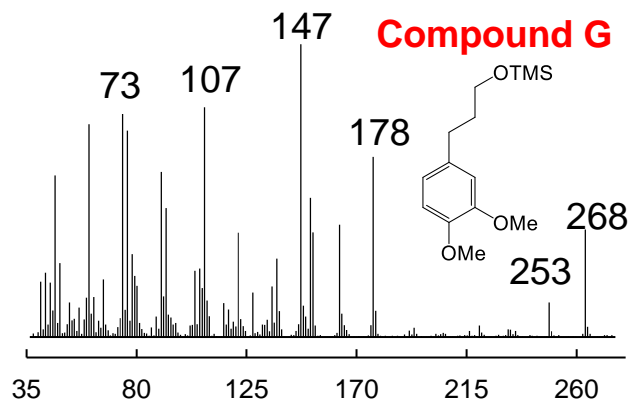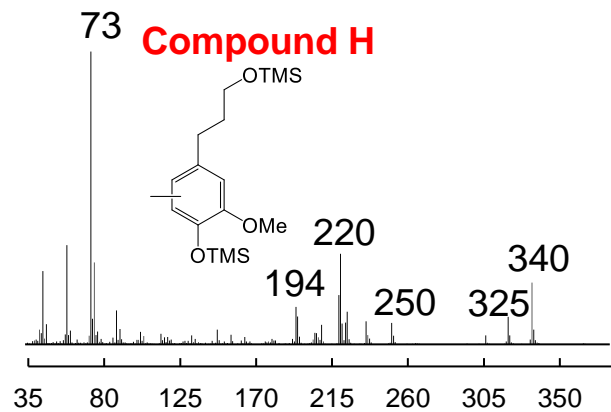

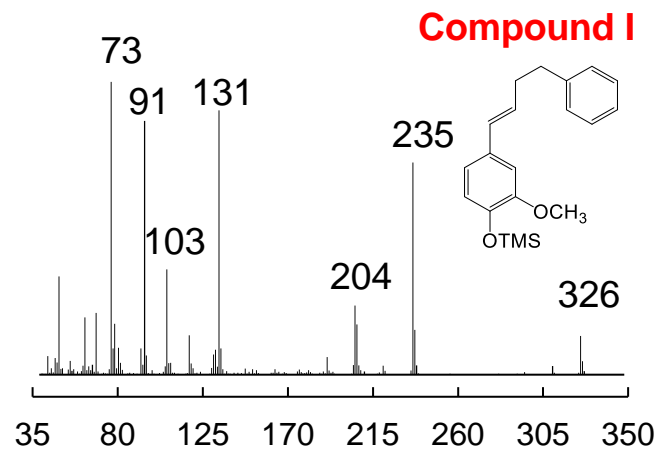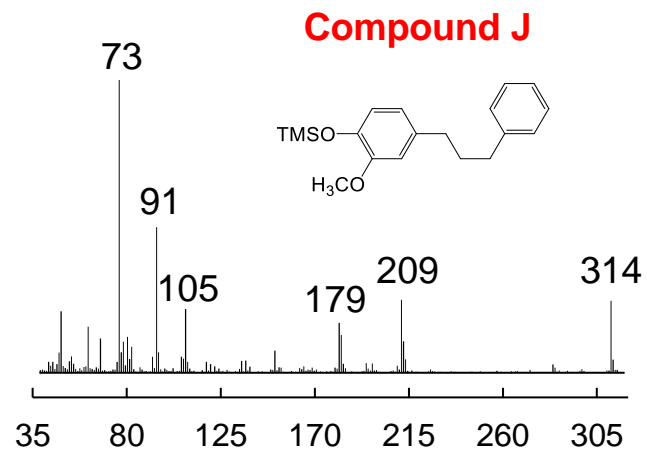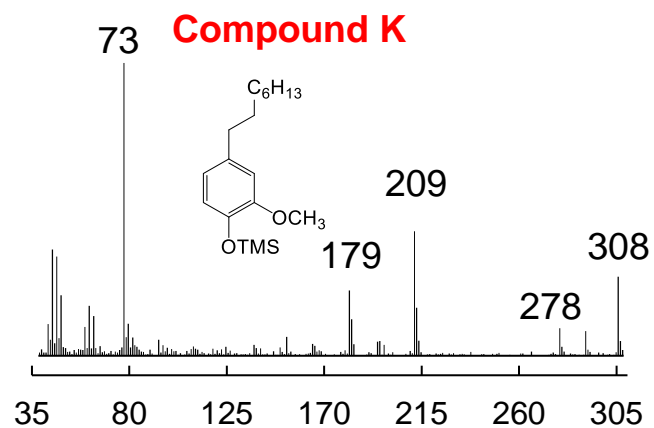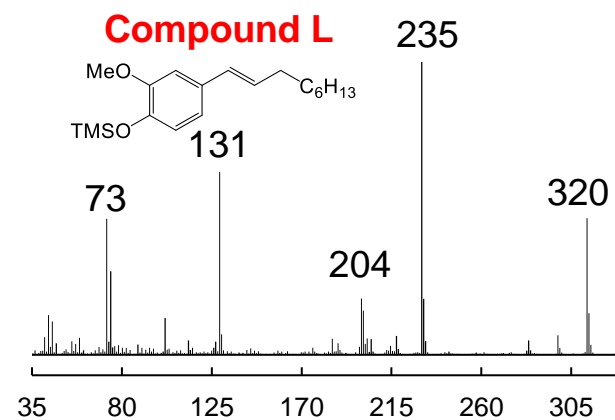

**Figure S5.** Mass spectra of products corresponding to compounds shown in Figure S3.
